# Supplementary material
Source: Springer Nature journal article supplement (https://www.springermedizin.de/resource/supplementary/12985_2013_2231_MOESM1_ESM.pdf/9606322)

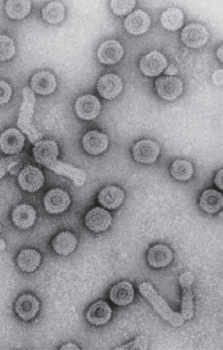

Dane particles  
 $10^9$

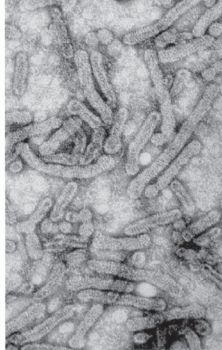

filaments  
 $10^{10}$

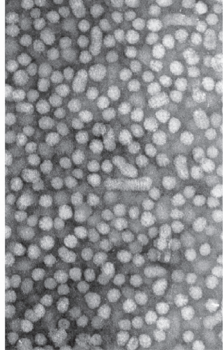

spheres  
 $10^{13}$

Supplement: MOESM1 [file 9606322]
